# Supplementary material for: Influence of Reduced Graphene Oxide and Carbon Nanotubes on the Structural, Electrical, and Photoluminescent Properties of Chitosan Films
Source: MDPI journal article supplement (doi:10.3390/polym16131827), 2024-06-27
Supplement: s1 [file s1]

# Influence of reduced graphene oxide and carbon nanotubes on the structural, electrical and photoluminescent properties of chitosan films

Jesús R. González-Martínez<sup>1</sup>, Ana B. López-Oyama<sup>2,3\*</sup>, Deyanira Del Ángel-López<sup>2</sup>, Crescencio García-Guendulain<sup>4\*</sup>, Eugenio Rodríguez González<sup>2</sup>, Eder U. Pulido-Barragán<sup>2,3</sup>, Felipe Barffuson-Domínguez<sup>5</sup>, Aurora G. Magallanes-Vallejo<sup>2</sup>, P. J. Mogica-Cantú<sup>2</sup>.

<sup>1</sup> Departamento de Investigación en Física (DIFUS). Universidad de Sonora. Blvd. Transversal S/N. 83000. Hermosillo, Sonora, México

<sup>2</sup> Centro de Investigación en Ciencia Aplicada y Tecnología Avanzada, Unidad Altamira del Instituto Politécnico Nacional. Km 14.5 Carr. Puerto Industrial. 89600. Altamira, Tamaulipas, México

<sup>3</sup> Conahcyt-Cicata Unidad Altamira IPN. Km. 14.5 Carretera Puerto Industrial. 89600. Altamira, Tamaulipas, México

<sup>4</sup> Tecnológico de Monterrey, Escuela de Ingeniería y Ciencias. Blvd Petrocel Km 1.3. 89603. Altamira, Tamaulipas, México

<sup>5</sup> Departamento de Física. Universidad de Sonora. Blvd. Transversal S/N. 83000. Hermosillo, Sonora, México

\* Correspondence: [ablopezoy@conahcyt.mx](mailto:ablopezoy@conahcyt.mx) (A. B. L. O); [crescencio.garcia@tec.mx](mailto:crescencio.garcia@tec.mx) (C. G. G.);

Supporting Information Tables and Figures

Table S1: Labels for films produced by solvent-casting method

| Chitosan molecular weight (kDa) | Label assigned according to chitosan molecular weight | Label for films produced with reduced graphene oxide / chitosan | Label for films produced with reduced graphene oxide-carbon nanotubes/chitosan |
|---------------------------------|-------------------------------------------------------|-----------------------------------------------------------------|--------------------------------------------------------------------------------|
| 50                              | LCs                                                   | rGO/LCs                                                         | rGO-CNTs/LCs                                                                   |
| 190                             | MCs                                                   | rGO/MCs                                                         | rGO-CNTs/MCs                                                                   |
| 310                             | HCs                                                   | rGO/HCs                                                         | rGO-CNTs/HCs                                                                   |

Table S2: Color purity percentage calculated from PL data

| Films         | Color purity (%) |
|---------------|------------------|
| rGO/ LCs      | 20.63            |
| rGO-CNTs/ LCs | 17.13            |
| rGO/MCs       | 18.95            |
| rGO-CNTs/MCs  | 16.34            |
| rGO/HCs       | 24.92            |
| rGO-CNTs/HCs  | 19.62            |

$$Color\ Purity = \frac{\sqrt{(x - x_s)^2 + (y - y_s)^2}}{\sqrt{(x_d - x_s)^2 + (y_d - y_s)^2}} * 100$$

Where:

x and y are the CIE coordinates of the entire spectrum.

x<sub>s</sub> and y<sub>s</sub> are the CIE coordinates of the standard illuminants of white light.

x<sub>d</sub> and y<sub>d</sub> are the CIE coordinates of the dominant wavelength.

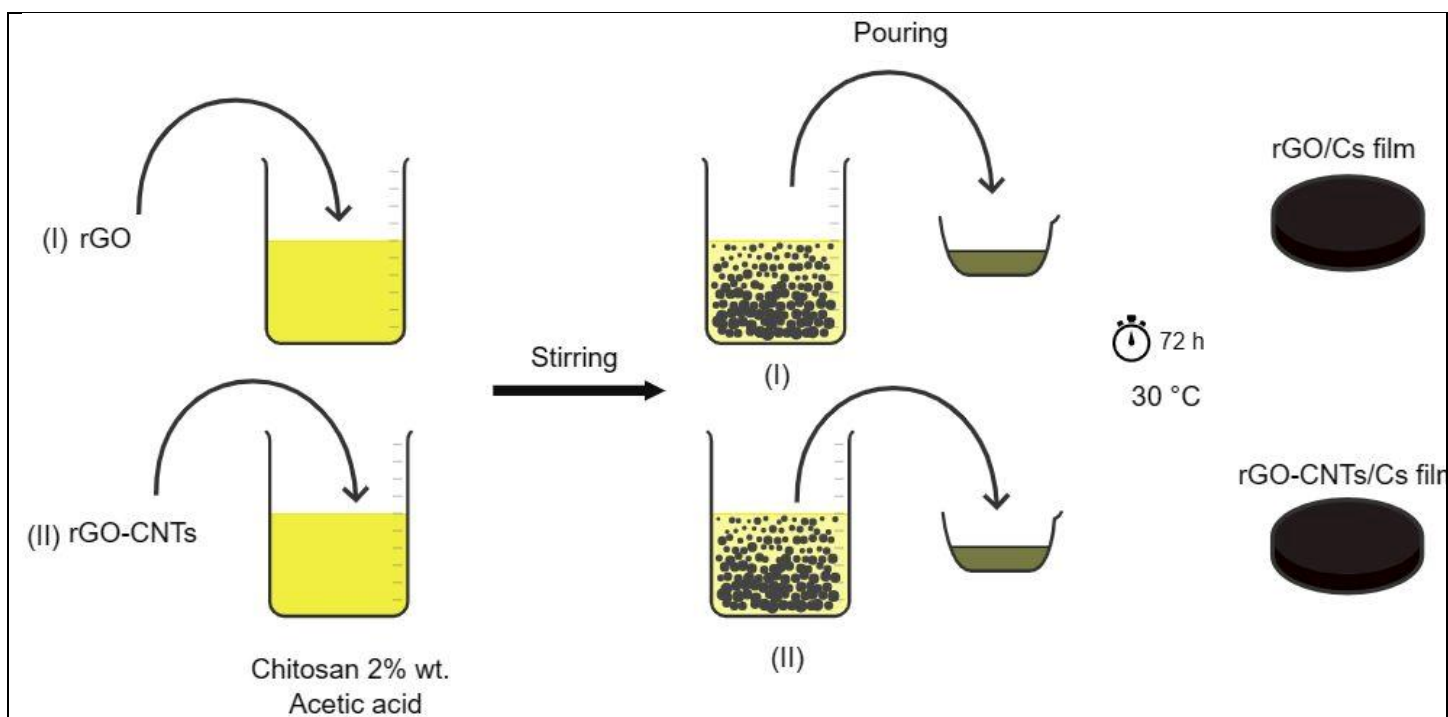

Figure S1. Fabrication of films

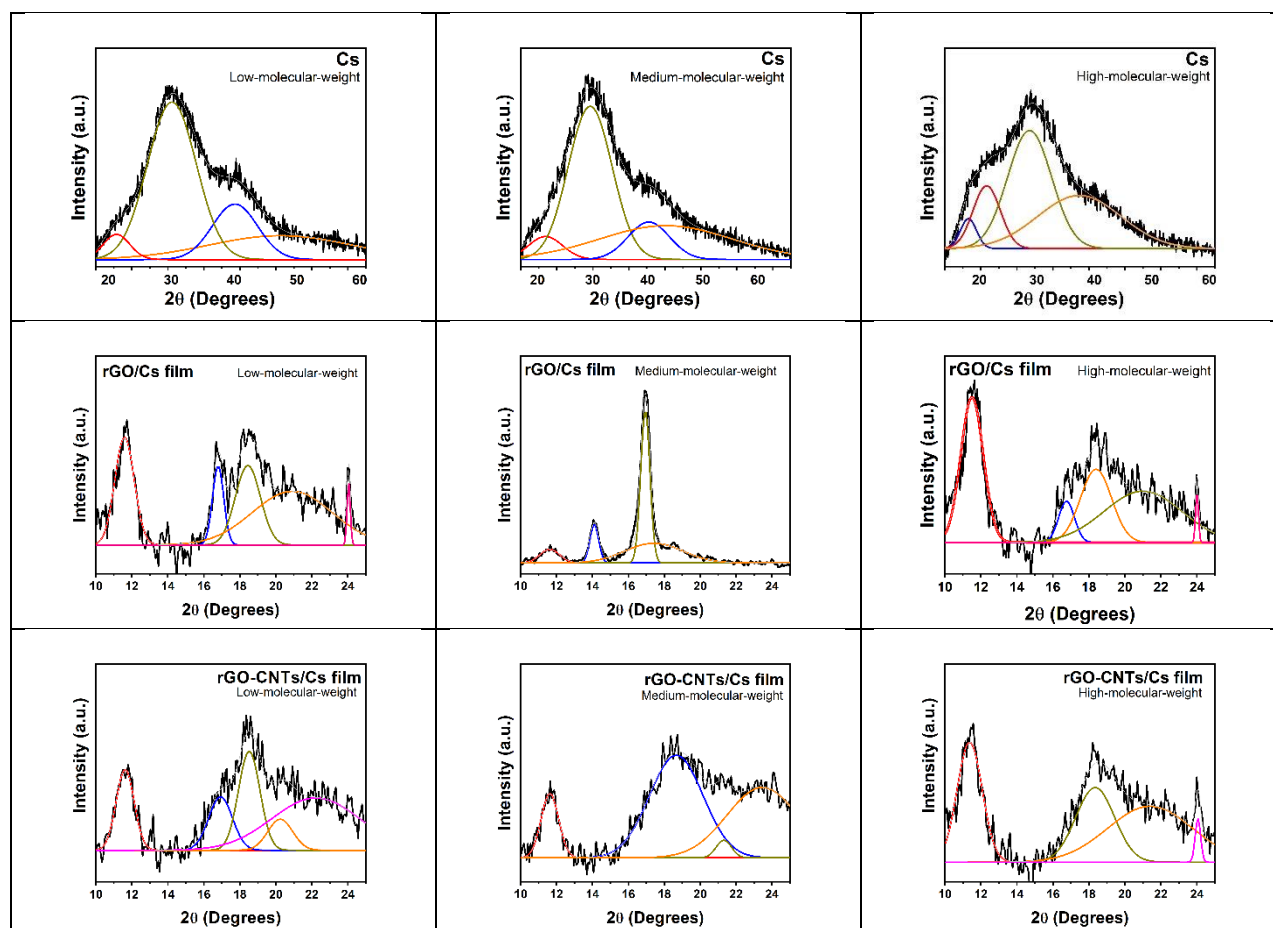

Figure S2: Analysis of the XRD pattern of rGO/Cs and rGO-CNTs/Cs films by the deconvolution method using the Voight approximation

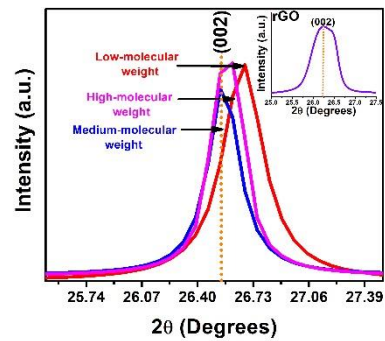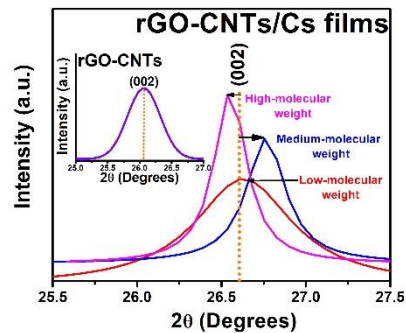

Figure S3. Analysis of the (002) plane of rGO/Cs films and rGO-CNTs/Cs films

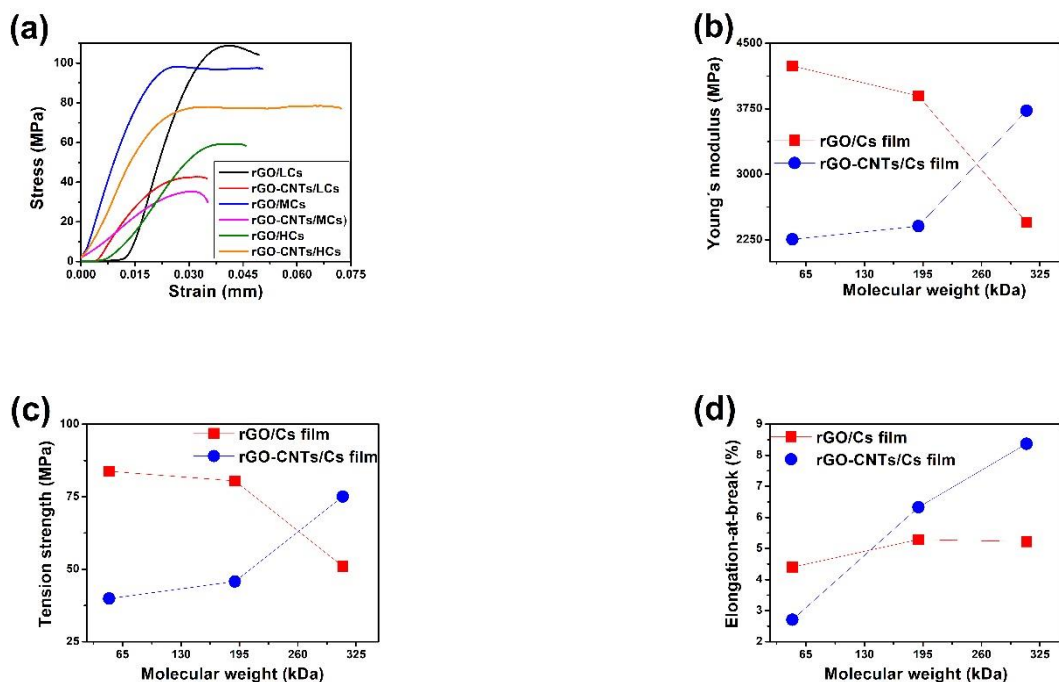

Figure S4. Mechanical properties of rGO/Cs films and rGO-CNTs/Cs films from LCs to HCs chitosan (a) stress-strain curves, (b) Young's modulus, (c) tension strength and (d) elongation-at break percentages

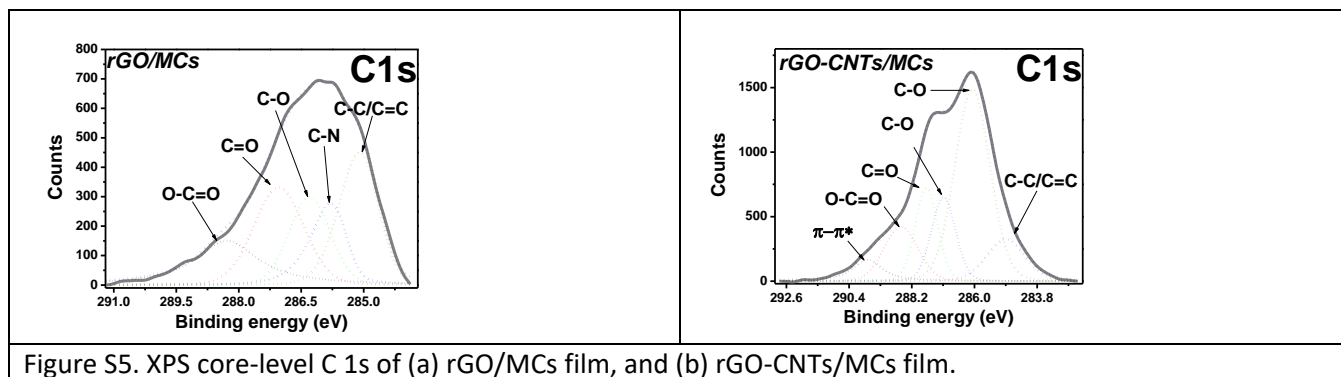

Figure S5. XPS core-level C 1s of (a) rGO/MCs film, and (b) rGO-CNTs/MCs film.

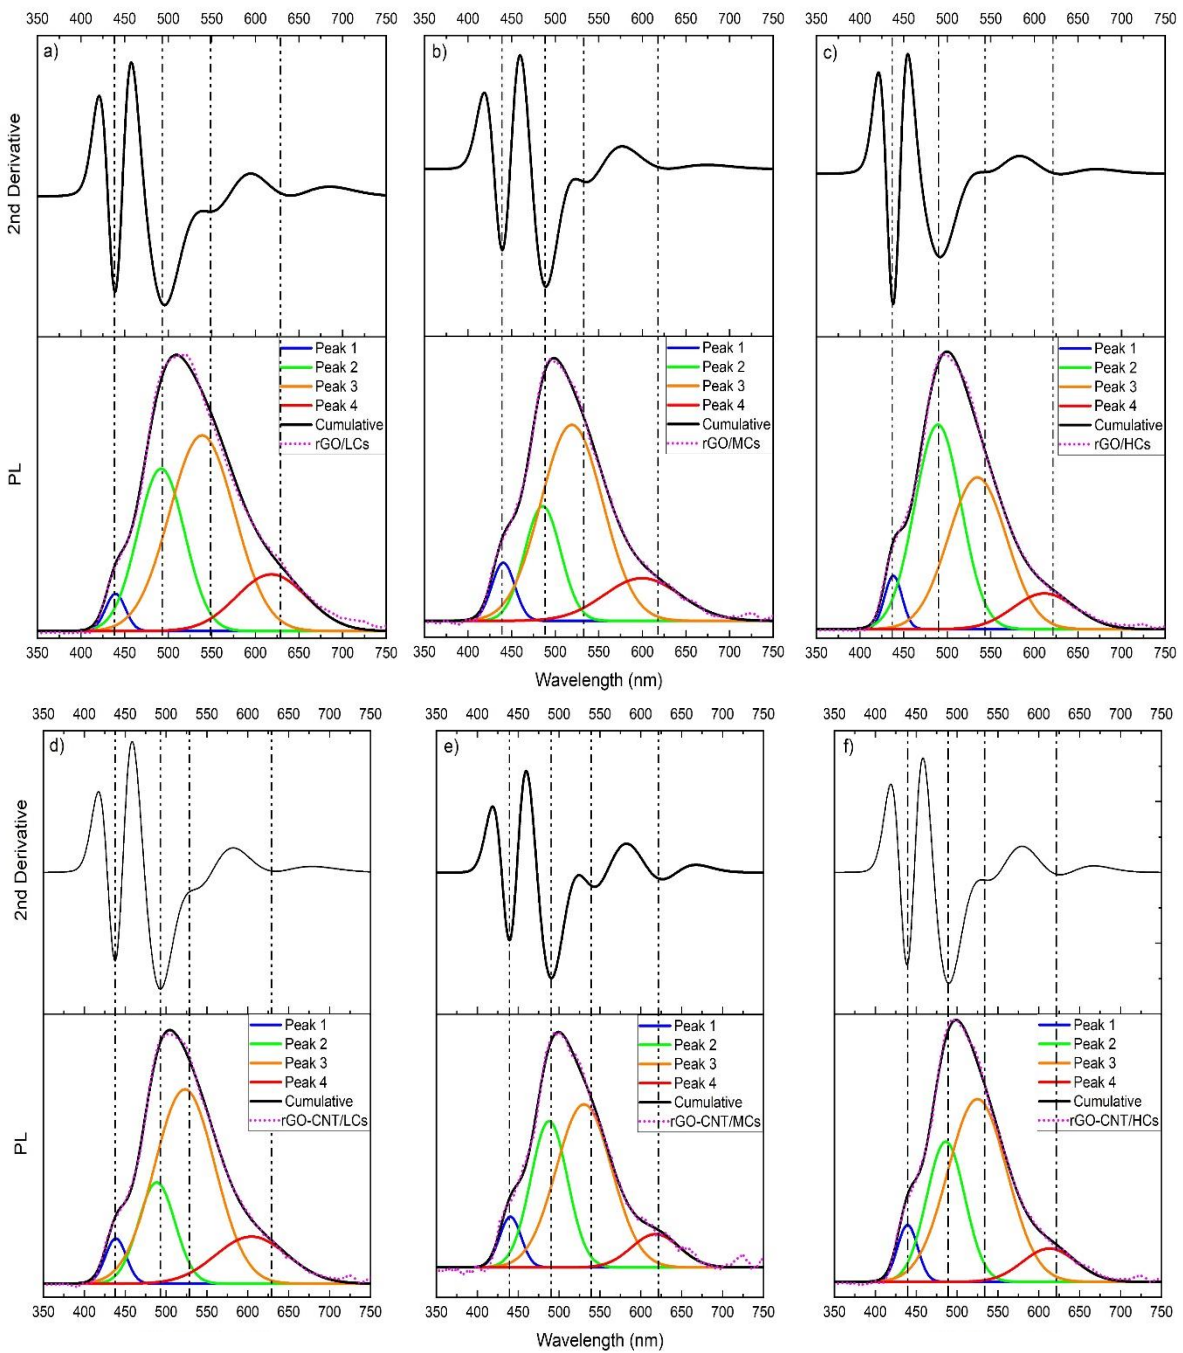

Figure S6. PL spectra deconvolution of the rGO/Cs and rGO-CNTs/Cs films using the multiple Gaussian peak fit. The second derivative of the cumulative peak is added as additional information in relation to the deconvolution process. Results reveal that second derivative minima are in well agreement with the center wavelength of the subpeaks maxima. The  $R^2$  adjusting coefficient was higher than 0.999 for the deconvolution of all samples.

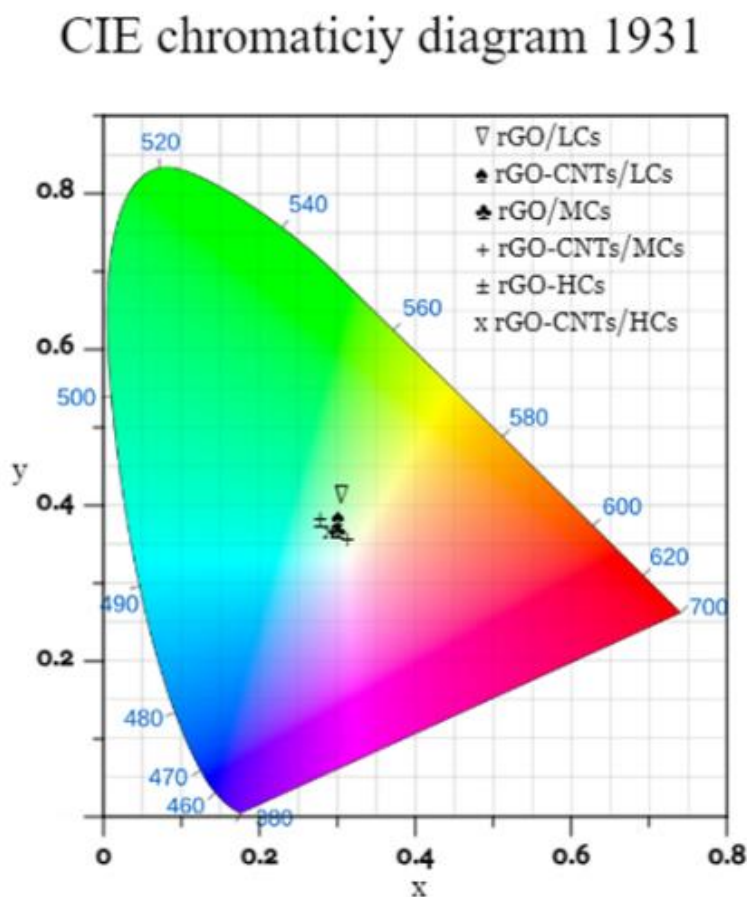

Figure S7. CIE diagram extracted from PL data
